# Supplementary material for: High prevalence of impaired awareness of hypoglycemia and severe hypoglycemia among people with insulin-treated type 2 diabetes: The Dutch Diabetes Pearl Cohort
Source: PubMed Central journal article supplement — BMJ Open Diabetes Res Care. 2020 Feb 26;8(1):e000935. doi: 10.1136/bmjdrc-2019-000935 (PMC7206921; doi:10.1136/bmjdrc-2019-000935), 2020-02-26
Supplement: bmjdrc-2019-000935supp001.pdf [file bmjdrc-2019-000935supp001.pdf]

1 **Supplementary file**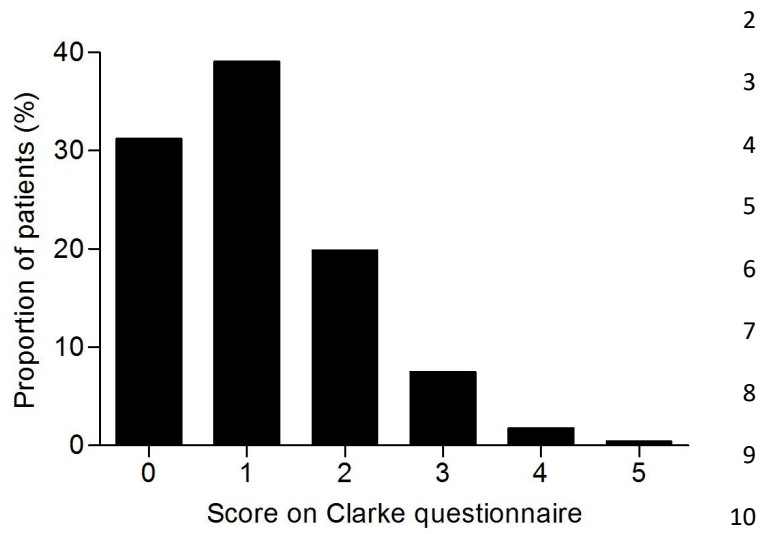11 *Supplemental Figure S1. Total score on Clarke questionnaire*

12

13 *Supplemental Table S1. Clinical characteristics of the study population*

|                                  | Total (N=2350)                                      |
|----------------------------------|-----------------------------------------------------|
| Sex                              |                                                     |
| Men                              | 1390 (59.1)                                         |
| Women                            | 960 (40.9)                                          |
| Age (years)                      | 61.1 ± 10.4                                         |
| <60 years                        | 970 (41.3)                                          |
| 60-70 years                      | 895 (38.1)                                          |
| >70 years                        | 485 (20.6)                                          |
| Diabetes duration (years)        | 14.8 ± 9.2                                          |
| <5 years                         | 262 (11.9)                                          |
| 5-10 years                       | 471 (21.4)                                          |
| 10-20 years                      | 927 (42.2)                                          |
| >20 years                        | 537 (24.4)                                          |
| HbA <sub>1c</sub> (%) (mmol/mol) | 7.9 ± <del>1.43.5</del> (62.5 ± 14. <del>87</del> ) |
| <7.0% (53 mmol/mol)              | 565 (25.2)                                          |
| 7.0 - 8.0% (53 – 64 mmol/mol)    | 801 (35.8)                                          |
| >8.0% (64 mmol/mol)              | 874 (39.0)                                          |
| Insulin treatment                |                                                     |
| Basal only                       | 478 (20.3)                                          |
| Pre-mixed                        | 379 (16.1)                                          |
| Basal-bolus                      | 1490 (63.4)                                         |
| Oral glucose lowering medication | 1523 (64.8)                                         |

14 Data are shown as number (%) or mean±SD.
